# Supplementary material for: Modeling of the Zn2+ binding in the 1–16 region of the amyloid β peptide involved in Alzheimer’s disease
Source: Royal Society of Chemistry journal article supplement (doi:10.1039/b822771c), 2009-01-01
Supplement: b822771c.pdf [file b822771c.pdf]

# Modeling the $\text{Zn}^{+2}$ binding in the 1-16 region of the amyloid $\beta$ peptide involved in Alzheimer's disease

Sara Furlan and Giovanni La Penna

National research council, Institute for chemistry of organo-metallic compounds,  
via Madonna del Piano 10, I-50019 Sesto fiorentino (Firenze), Italy.

E-mail: glapenna@iccom.cnr.it

March 27, 2009

## Supplementary material

### Trajectories:

The CP-MD trajectories of representative model ASP1 is provided in AMBER CRD format (x, y, z for each atom in Å) and compressed using the program BZIP2. The PDB file ASP1\_first.pdb contains the  $t = 0$  structure and the necessary information for graphical representation. A script file for VMD is also provided.

Parameters used for semiempirical models of Zn-A $\beta$ (1-16) complexes. No torsional parameters have been used (all parameters are set to zero). Atoms not indicated are those in the PARM94 Amber force-field. Atom type X indicates any possible atom involved.

Lennard-Jones parameters for Zn.

$$\epsilon (\text{ZN-ZN}) = 0.25104 \text{ kJ/mol}$$

$$\sigma (\text{ZN-ZN}) = 3.296 \text{ \AA}$$

All the other atoms have the same Lennard-Jones parameters of the corresponding atoms in PARM94 force-field.

Table 1: Summary of atom types

| PDB atom name            | Atom type |
|--------------------------|-----------|
| Zn                       | ZN        |
| N $\delta$ 1 (His 6, 14) | NB        |
| N $\epsilon$ 2 (His 13)  | NA        |
| O $\delta$ (Asp)         | OA        |
| O $\epsilon$ (Glu)       | OA        |
| O $\eta$ (Tyr)           | OB        |

Table 2: Stretching parameters, energy contribution per pair is given by  $U_{str} = k_{str}/2 (r - r_{eq})^2$ , with  $r$  the distance between atoms in the pair.

| Pair  | $k_{str}$ (kJ mol $^{-1}$ Å $^{-2}$ ) | $r_{eq}$ Å |
|-------|---------------------------------------|------------|
| ZN-NA | 3464.352                              | 2.1        |
| ZN-NB | 3464.352                              | 2.1        |
| ZN-OA | 3464.352                              | 2.1        |
| ZN-OB | 3464.352                              | 2.1        |

Table 3: Bending parameters, energy contribution per three atoms is given by  $U_{ben} = k_{ben}/2 (\theta - \theta_{eq})^2$ , with  $\theta$  the bending angle for the two bonds.

| Atoms   | $k_{ben}$ (kJ mol <sup>-1</sup> rad <sup>-2</sup> ) | $\theta_{eq}$ ° |
|---------|-----------------------------------------------------|-----------------|
| X-Zn-X  | 0                                                   | -               |
| X-NB-ZN | 585.76                                              | 121.5           |
| X-NA-ZN | 585.76                                              | 121.5           |
| X-OA-ZN | 0                                                   | -               |
| X-OB-ZN | 0                                                   | -               |

Table 4: Point charges of Zn binding residues. All atoms not indicated have the standard PARM94 charges.

| Atom                                          | $q$ ( $e$ ) |
|-----------------------------------------------|-------------|
| Zn                                            | 0.5         |
| His bonded to Zn via N $\epsilon$ 2 (His 13)  |             |
| C $\beta$                                     | -0.0191     |
| H $\beta$                                     | 0.0673      |
| C $\gamma$                                    | 0.2         |
| N $\delta$ 1                                  | -0.3        |
| H $\delta$ 1                                  | 0.3         |
| C $\epsilon$ 1                                | 0.32        |
| H $\epsilon$ 1                                | 0.036       |
| N $\epsilon$ 2                                | -0.3        |
| C $\delta$ 2                                  | 0.1         |
| H $\delta$ 2                                  | 0.036       |
| His bonded to Zn via N $\delta$ 1 (His 6, 14) |             |
| C $\beta$                                     | 0.01877     |
| H $\beta$                                     | 0.06287     |
| C $\gamma$                                    | 0.1         |
| N $\delta$ 1                                  | -0.3        |
| C $\epsilon$ 1                                | 0.32        |
| H $\epsilon$ 1                                | 0.036       |
| N $\epsilon$ 2                                | -0.3        |
| H $\epsilon$ 2                                | 0.3         |
| C $\delta$ 2                                  | 0.2         |
| H $\delta$ 2                                  | 0.036       |
